# Supplementary material
Source: Research Square preprint supplement (doi:10.21203/rs.3.rs-8966567/v1)
Supplement: Supplementary file 1 [file 7417bcae2eebbc1201a23486.docx]

**Supplementary Information**

**Production and functional evaluation of cyclic carotenoids in the purple bacterium, *Rubrivivax gelationsus***

Makoto Nabeta, Jiro Harada, Shinichi Takaichi, Keizo Shimada, Kazuhito Inoue, and Kenji V. P. Nagashima

Fig. S1 Nabeta et al.

**Figure S1. Growth of wild-type and mutant strains of *R. gelatinosus* under semi-aerobic conditions.** Cell density was monitored by measuring absorbance at 660 nm. Culture conditions were as described in the Methods section. For each time point, five independent measurements were obtained; the highest and lowest values were excluded, and the mean of the remaining three measurements was plotted versus time.

Fig. S2 Nabeta et al.

**A B C D E F**


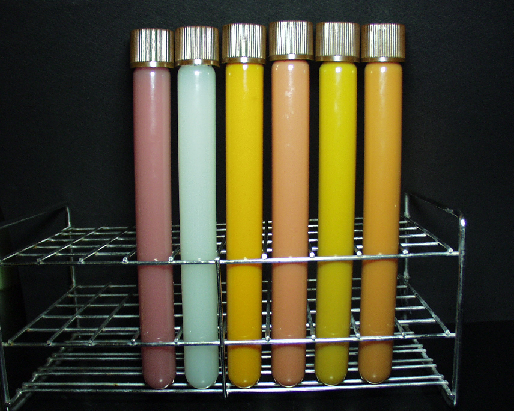


**Figure S2. Concentrated cell suspensions of *R. gelatinosus* wild-type and mutants grown under semi-aerobic conditions.** A, wild-type; B, ΔcrtIs (carotenoidless strain); C, DIDC-IY (β-carotene accumulating strain); D, DIDC-IYW (canthaxanthin accumulating strain); E, DIDC-IYZ (zeaxanthin accumulating strain); F, DIDC-IYWZ (astaxanthin accumulating strain). All strains were grown under semi-aerobic dark conditions. Cells were harvested by centrifugation and resuspended in MOPS buffer to one-tenth of the original culture volume to enhance visualization of cellular pigmentation.

Fig. S3 Nabeta et al.

A

B

**Figure S3. (A) Schematic representation of the centrifuge tube after fractionation to isolate the membrane fraction. (B) Absorption spectrum of the orange fraction obtained from the DIDC-IY (β-carotene accumulating) mutant strain*.*** Following cell disruption and centrifugation to collect the membrane fraction, a distinct orange-colored layer was observed at the top of the centrifuge tube in the DIDC-IY strain. This orange fraction was not detected in the wild-type strain.

Fig. S4 Nabeta et al.

**Figure S4. Absorption spectra of RC-LH1 (black) and LH2 (red) complexes isolated from the DIDC-IYWZ (astaxanthin accumulating) mutant strain.**
